# Supplementary material for: Genome-wide identification, characterization and expression analysis of populus leucine-rich repeat receptor-like protein kinase genes
Source: PubMed Central journal article supplement (PMC3682895; doi:10.1186/1471-2164-14-318), 2013-05-10

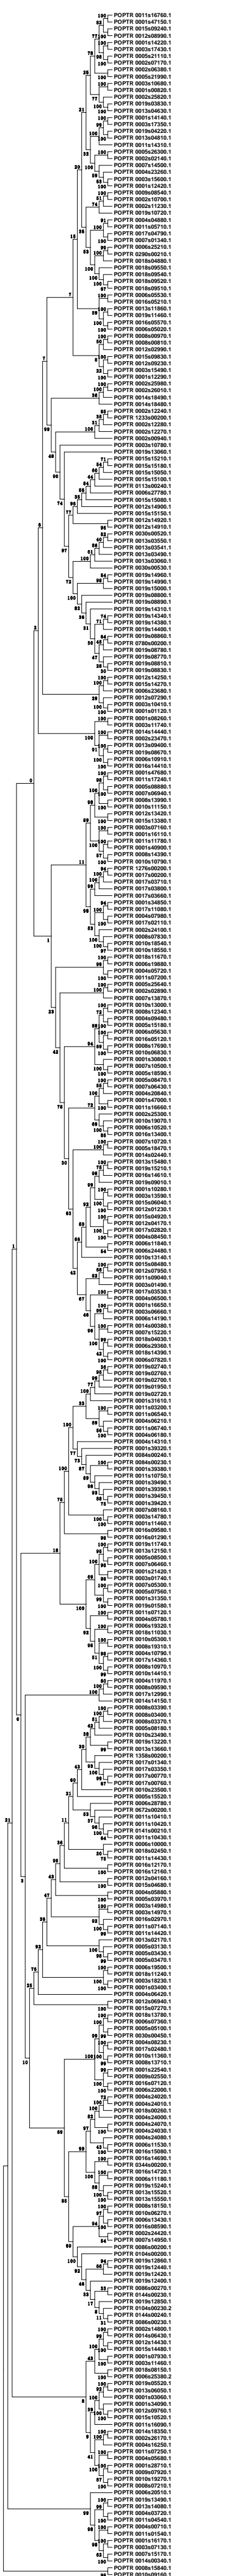

Supplement: 1471-2164-14-318-S3.pdf [file 1471-2164-14-318-S3.pdf]
