# Supplementary material for: Genome-wide identification, characterization and expression analysis of populus leucine-rich repeat receptor-like protein kinase genes
Source: PubMed Central journal article supplement (PMC3682895; doi:10.1186/1471-2164-14-318), 2013-05-10
Supplement: 1471-2164-14-318-S12.pdf [file 1471-2164-14-318-S12.pdf]

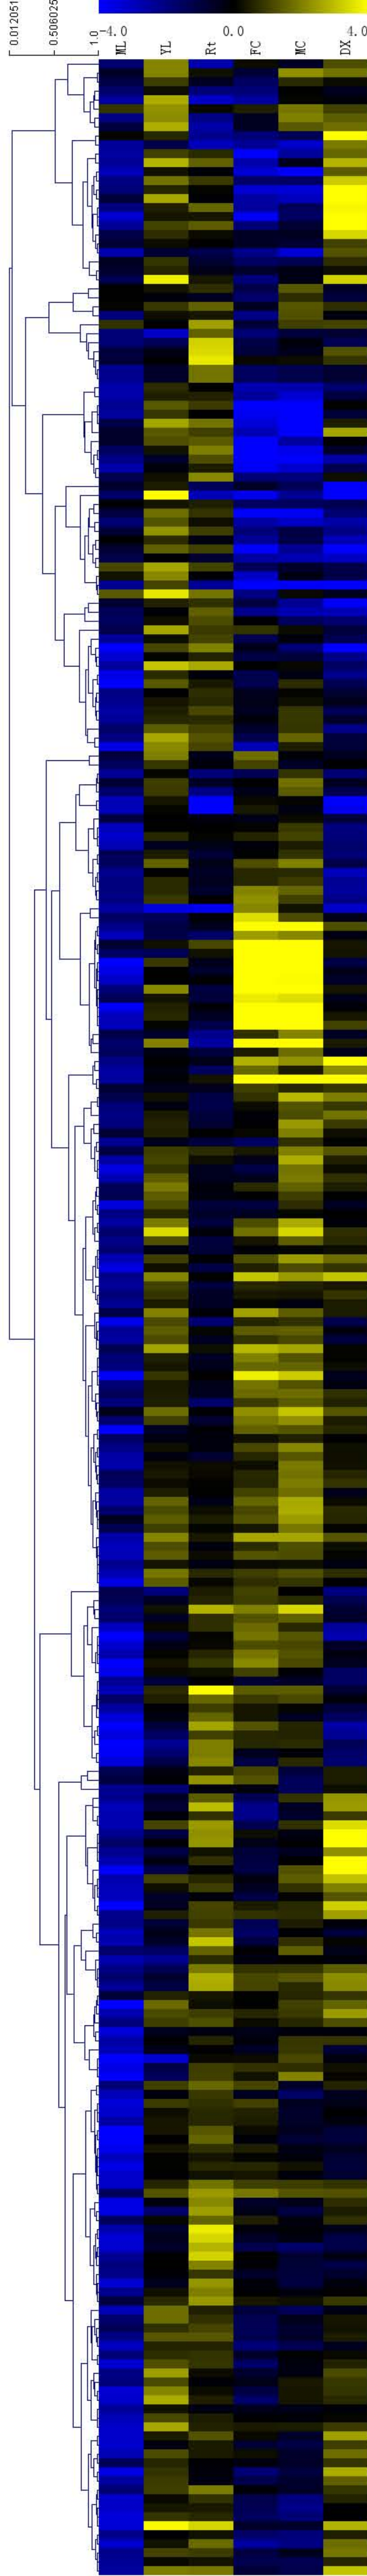

POPTR\_0015=01680  
 POPTR\_0003=01490  
 POPTR\_0001=11310  
 POPTR\_0006=21180  
 POPTR\_0012=11250  
 POPTR\_0019=12400  
 POPTR\_0001=20810  
 POPTR\_0019=13220  
 POPTR\_0002=07170  
 POPTR\_0005=21110  
 POPTR\_0013=09400  
 POPTR\_0016=05210  
 POPTR\_0010=13000  
 POPTR\_0013=15180  
 POPTR\_0015=01920  
 POPTR\_0019=08670  
 POPTR\_0013=06050  
 POPTR\_0006=05020  
 POPTR\_0016=11110  
 POPTR\_0016=08590  
 POPTR\_0010=18510  
 POPTR\_0019=10720  
 POPTR\_0017=02110  
 POPTR\_0011=16760  
 POPTR\_0012=11130  
 POPTR\_0003=11780  
 POPTR\_0017=00760  
 POPTR\_0001=12420  
 POPTR\_0018=09550  
 POPTR\_0015=15150  
 POPTR\_0013=15520  
 POPTR\_0002=11230  
 POPTR\_0010=11110  
 POPTR\_0008=03390  
 POPTR\_0019=01580  
 POPTR\_0019=01580  
 POPTR\_0003=15600  
 POPTR\_0010=05300  
 POPTR\_0007=11500  
 POPTR\_0001=08230  
 POPTR\_0017=11360  
 POPTR\_0019=09010  
 POPTR\_0007=01310  
 POPTR\_0001=21030  
 POPTR\_0005=26300  
 POPTR\_0017=12990  
 POPTR\_0019=11460  
 POPTR\_0007=06910  
 POPTR\_0006=23680  
 POPTR\_0002=26170  
 POPTR\_0001=10790  
 POPTR\_0001=21020  
 POPTR\_0015=10520  
 POPTR\_0001=31090  
 POPTR\_0001=17150  
 POPTR\_0006=22000  
 POPTR\_0016=09580  
 POPTR\_0019=05520  
 POPTR\_0001=11110  
 POPTR\_0019=12420  
 POPTR\_0001=21010  
 POPTR\_0008=07830  
 POPTR\_0008=19310  
 POPTR\_0001=18350  
 POPTR\_0001=18190  
 POPTR\_0003=15190  
 POPTR\_0003=01710  
 POPTR\_0015=13380  
 POPTR\_0001=11970  
 POPTR\_0015=06010  
 POPTR\_0010=18550  
 POPTR\_0011=07200  
 POPTR\_0008=18150  
 POPTR\_0017=01790  
 POPTR\_0001=23260  
 POPTR\_0001=05780  
 POPTR\_0010=19070  
 POPTR\_0012=11920  
 POPTR\_0019=11960  
 POPTR\_0001=39320  
 POPTR\_0017=00770  
 POPTR\_0019=01950  
 POPTR\_0019=08770  
 POPTR\_0019=08780  
 POPTR\_0012=11900  
 POPTR\_0001=39420  
 POPTR\_0007=06460  
 POPTR\_0013=11860  
 POPTR\_0005=08880  
 POPTR\_0012=01160  
 POPTR\_0003=10780  
 POPTR\_0001=21000  
 POPTR\_0013=03060  
 POPTR\_0001=00230  
 POPTR\_0001=06420  
 POPTR\_0015=15100  
 POPTR\_0003=06660  
 POPTR\_0001=06500  
 POPTR\_0006=11190  
 POPTR\_0007=15170  
 POPTR\_0005=05100  
 POPTR\_0001=16650  
 POPTR\_0017=03530  
 POPTR\_0007=15220  
 POPTR\_0012=11910  
 POPTR\_0006=07820  
 POPTR\_0001=00310  
 POPTR\_0018=11390  
 POPTR\_0008=03370  
 POPTR\_0001=00380  
 POPTR\_0672=00200  
 POPTR\_0009=07920  
 POPTR\_0018=02450  
 POPTR\_0011=07250  
 POPTR\_1233=00200  
 POPTR\_0007=11950  
 POPTR\_0008=07210  
 POPTR\_0011=10420  
 POPTR\_0002=12270  
 POPTR\_0019=12860  
 POPTR\_0003=11710  
 POPTR\_0006=19880  
 POPTR\_0016=02970  
 POPTR\_0018=01030  
 POPTR\_0019=11310  
 POPTR\_0011=09010  
 POPTR\_0011=16660  
 POPTR\_0012=13420  
 POPTR\_0001=11150  
 POPTR\_0011=11130  
 POPTR\_0012=07950  
 POPTR\_0017=00200  
 POPTR\_0011=11310  
 POPTR\_0011=10130  
 POPTR\_0019=11990  
 POPTR\_0002=11800  
 POPTR\_0010=23500  
 POPTR\_0008=13710  
 POPTR\_0005=25610  
 POPTR\_0006=20510  
 POPTR\_0015=11270  
 POPTR\_0017=03660  
 POPTR\_0018=09510  
 POPTR\_0019=13060  
 POPTR\_0001=05880  
 POPTR\_0015=15210  
 POPTR\_0011=16090  
 POPTR\_0019=11310  
 POPTR\_0008=00810  
 POPTR\_0003=11980  
 POPTR\_0010=25190  
 POPTR\_1358=00200  
 POPTR\_0010=19270  
 POPTR\_0017=03350  
 POPTR\_0018=11210  
 POPTR\_0019=08810  
 POPTR\_0006=29360  
 POPTR\_0013=15550  
 POPTR\_0019=11380  
 POPTR\_0001=18180  
 POPTR\_0002=00910  
 POPTR\_0015=15180  
 POPTR\_0016=12170  
 POPTR\_0018=09510  
 POPTR\_0006=00230  
 POPTR\_0001=03400  
 POPTR\_0002=02110  
 POPTR\_0015=09830  
 POPTR\_0013=13660  
 POPTR\_0002=02890  
 POPTR\_0001=05720  
 POPTR\_0001=16170  
 POPTR\_0011=10410  
 POPTR\_0015=15110  
 POPTR\_0003=17350  
 POPTR\_0009=08510  
 POPTR\_0001=39390  
 POPTR\_0013=01630  
 POPTR\_0018=11030  
 POPTR\_0019=15210  
 POPTR\_0001=06180  
 POPTR\_0006=19500  
 POPTR\_0006=28780  
 POPTR\_0013=02170  
 POPTR\_0016=11720  
 POPTR\_0002=28820  
 POPTR\_0006=25210  
 POPTR\_0015=07270  
 POPTR\_0011=06710  
 POPTR\_0019=15210  
 POPTR\_0016=11610  
 POPTR\_0017=01310  
 POPTR\_0017=02480  
 POPTR\_0003=10680  
 POPTR\_0001=03720  
 POPTR\_0001=16250  
 POPTR\_0006=11810  
 POPTR\_0001=28710  
 POPTR\_0016=15080  
 POPTR\_0012=08990  
 POPTR\_0017=02820  
 POPTR\_0011=07110  
 POPTR\_0010=06830  
 POPTR\_0011=17210  
 POPTR\_0016=05570  
 POPTR\_0001=08450  
 POPTR\_0018=08150  
 POPTR\_0001=11220  
 POPTR\_0001=11460  
 POPTR\_0007=08160  
 POPTR\_0012=06910  
 POPTR\_0001=31850  
 POPTR\_0002=25980  
 POPTR\_0002=26010  
 POPTR\_0017=11080  
 POPTR\_0002=21420  
 POPTR\_0001=01880  
 POPTR\_0006=11530  
 POPTR\_0015=08480  
 POPTR\_0002=06380  
 POPTR\_0016=07120  
 POPTR\_0005=21990  
 POPTR\_0001=11110  
 POPTR\_0006=25380  
 POPTR\_0019=03830  
 POPTR\_0008=00970  
 POPTR\_0008=09590  
 POPTR\_0007=06430  
 POPTR\_0001=30800  
 POPTR\_0018=13780  
 POPTR\_0003=18230  
 POPTR\_0008=11390  
 POPTR\_0011=01510  
 POPTR\_0002=21100  
 POPTR\_0007=10500  
 POPTR\_0019=13190  
 POPTR\_0005=08180  
 POPTR\_0003=11460  
 POPTR\_0001=10900  
 POPTR\_0001=16110  
 POPTR\_0019=01220  
 POPTR\_0003=17430  
 POPTR\_0013=01810  
 POPTR\_0002=10700  
 POPTR\_0001=21080  
 POPTR\_0016=11690  
 POPTR\_0007=05300  
 POPTR\_0003=07160  
 POPTR\_0011=11780  
 POPTR\_0001=07930  
 POPTR\_0006=13430  
 POPTR\_0001=10280  
 POPTR\_0009=02550  
 POPTR\_0005=08470  
 POPTR\_0012=09760  
 POPTR\_0008=15810  
 POPTR\_0019=11710  
 POPTR\_0006=05630  
 POPTR\_0001=02410  
 POPTR\_0001=08260  
 POPTR\_0010=13110  
 POPTR\_0016=13400  
 POPTR\_0003=07130  
 POPTR\_0012=02990  
 POPTR\_0005=18470  
 POPTR\_0011=11420  
 POPTR\_0007=10720  
 POPTR\_0015=11380  
 POPTR\_0010=06270  
 POPTR\_0013=12150  
 POPTR\_0003=10410  
 POPTR\_0002=23470  
 POPTR\_0001=06430  
 POPTR\_0001=01120  
 POPTR\_0001=00710  
 POPTR\_0018=11670  
 POPTR\_0001=22510  
 POPTR\_0007=13870
