# Supplementary material for: Genome-wide identification, characterization and expression analysis of populus leucine-rich repeat receptor-like protein kinase genes
Source: PubMed Central journal article supplement (PMC3682895; doi:10.1186/1471-2164-14-318), 2013-05-10
Supplement: 1471-2164-14-318-S13.pdf [file 1471-2164-14-318-S13.pdf]

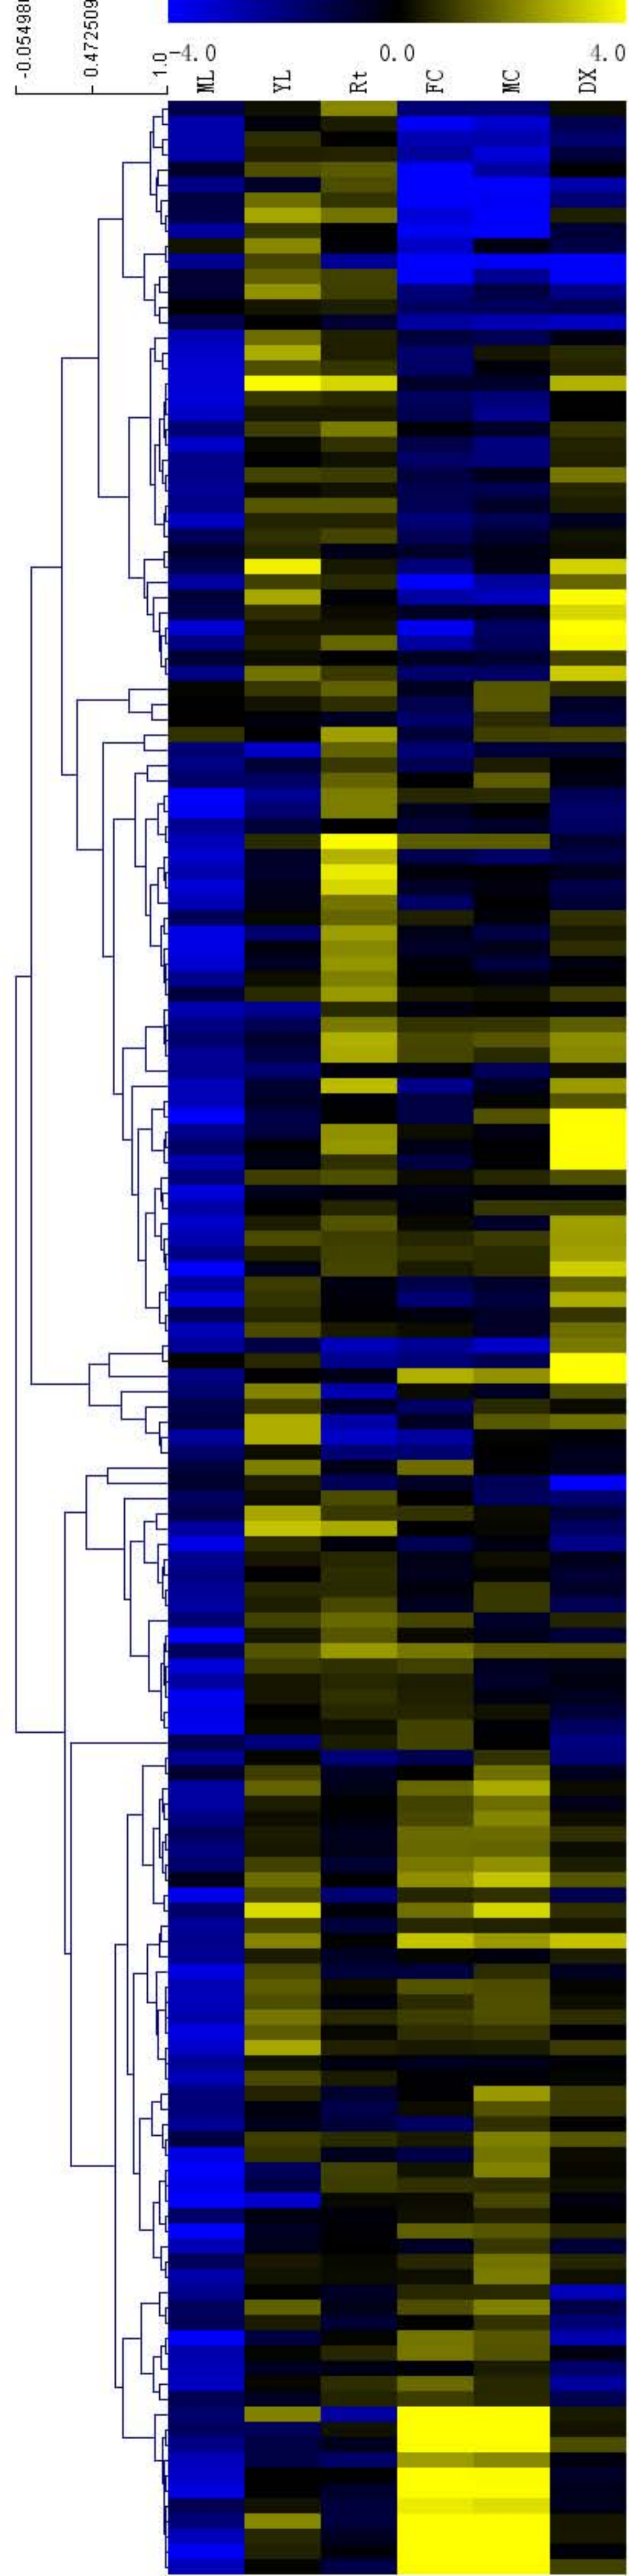

POPTR\_0019=11460 XI-c 20  
 POPTR\_0017=12990 XIII 43  
 POPTR\_0003=15600 XI-a 10  
 POPTR\_0010=05300 II 104  
 POPTR\_0007=01340 XI-a 3  
 POPTR\_0005=26300 XI-a 9  
 POPTR\_0004=10790 II 101  
 POPTR\_0017=14360 II 101  
 POPTR\_0004=08230 IX 122  
 POPTR\_0019=05520 VI 38  
 POPTR\_0014=14440 IV 88  
 POPTR\_0001=47150 XI-b 14  
 POPTR\_0015=10520 VI 39  
 POPTR\_0002=26170 VI 34  
 POPTR\_0006=22000 IX 125  
 POPTR\_0006=13430 I-a 94  
 POPTR\_0006=10520 IV 85  
 POPTR\_0019=11740 II 112  
 POPTR\_0014=06430 IV 84  
 POPTR\_0002=23470 IV 88  
 POPTR\_0003=10410 I-b 96  
 POPTR\_0010=06270 I-a 93  
 POPTR\_0013=12150 II 112  
 POPTR\_0001=01120 I-b 96  
 POPTR\_0018=11670 VI 37  
 POPTR\_0001=22540 IX 124  
 POPTR\_0005=08470 VI 35  
 POPTR\_0012=09760 VI 39  
 POPTR\_0009=02550 IX 124  
 POPTR\_0011=16760 XI-b 14  
 POPTR\_0012=14430 IV 82  
 POPTR\_0013=09400 IV 89  
 POPTR\_0019=08670 IV 89  
 POPTR\_0016=08590 I-a 94  
 POPTR\_0006=05020 XI-c 21  
 POPTR\_0013=06050 VI 38  
 POPTR\_0010=18540 X 69  
 POPTR\_0013=15480 III 131  
 POPTR\_0001=12420 XI-a 10  
 POPTR\_0003=14780 XIII 46  
 POPTR\_0017=00760 XII-b 65  
 POPTR\_0015=15150 VII-b 26  
 POPTR\_0013=15520 VIII 119  
 POPTR\_0001=14220 XI-b 12  
 POPTR\_0012=06940 XIV 40  
 POPTR\_0015=07270 XIV 40  
 POPTR\_0011=06740 XIII 48  
 POPTR\_0004=06180 XIII 48  
 POPTR\_0006=19500 XII-a 55  
 POPTR\_0002=10700 XI-a 5  
 POPTR\_0003=17430 XI-b 12  
 POPTR\_0013=04810 XI-b 18  
 POPTR\_0001=11460 XIII 46  
 POPTR\_0019=04220 XI-b 18  
 POPTR\_0001=16110 X 79  
 POPTR\_0001=40900 X 80  
 POPTR\_0003=07160 X 79  
 POPTR\_0011=11780 X 80  
 POPTR\_0001=07930 IV 83  
 POPTR\_0001=34850 X 72  
 POPTR\_0002=25980 VII-a 23  
 POPTR\_0002=26010 VII-a 23  
 POPTR\_0017=11080 X 72  
 POPTR\_0017=02480 IX 122  
 POPTR\_0004=03720 V 127  
 POPTR\_0016=05570 XI-c 21  
 POPTR\_0011=07140 XII-a 57  
 POPTR\_0001=28710 II 110  
 POPTR\_0016=15080 VIII 117  
 POPTR\_0017=02820 III 135  
 POPTR\_0015=08480 X 75  
 POPTR\_0002=06380 XI-b 15  
 POPTR\_0016=07120 IX 125  
 POPTR\_0003=07130 V 129  
 POPTR\_0006=11530 VIII 117  
 POPTR\_0018=08150 XI-a 6  
 POPTR\_0004=08450 III 135  
 POPTR\_0015=14480 IV 82  
 POPTR\_0007=10720 III 137  
 POPTR\_0011=14420 XII-a 57  
 POPTR\_0005=18470 III 137  
 POPTR\_0005=21110 XI-b 11  
 POPTR\_0002=07170 XI-b 11  
 POPTR\_0009=07920 II 110  
 POPTR\_0015=04680 XII-a 61  
 POPTR\_0004=14310 XIII 50  
 POPTR\_0019=13220 XII-b 64  
 POPTR\_0012=14250 XI-b 16  
 POPTR\_0006=24480 III 138  
 POPTR\_0012=14920 VII-b 28  
 POPTR\_0007=06940 X 76  
 POPTR\_0008=19310 II 104  
 POPTR\_0014=18350 VI 34  
 POPTR\_0015=13380 XIV 41  
 POPTR\_0004=11970 XIII 43  
 POPTR\_0011=07200 XIII 45  
 POPTR\_0010=18550 X 69  
 POPTR\_0017=04790 XI-a 3  
 POPTR\_0008=18150 I-a 93  
 POPTR\_0008=00970 XI-c 22  
 POPTR\_0003=18230 XII-a 54  
 POPTR\_0003=11460 IV 83  
 POPTR\_0007=06430 VI 35  
 POPTR\_0018=13780 IX 120  
 POPTR\_0011=04540 V 127  
 POPTR\_0007=10500 I-b 95  
 POPTR\_0019=15210 III 131  
 POPTR\_0004=05720 XIII 45  
 POPTR\_0001=39320 XIII 50  
 POPTR\_0017=00770 XII-b 66  
 POPTR\_0002=00940 XIV 42  
 POPTR\_0014=18480 VII-a 24  
 POPTR\_0018=11240 XII-a 55  
 POPTR\_0008=00810 XI-c 22  
 POPTR\_0015=15210 VII-b 26  
 POPTR\_1358=00200 XII-b 66  
 POPTR\_0010=23490 XII-b 67  
 POPTR\_0015=14270 XI-b 16  
 POPTR\_0012=07950 X 75  
 POPTR\_0010=23500 XII-b 67  
 POPTR\_0002=14800 IV 84  
 POPTR\_0005=25640 IV 86  
 POPTR\_0012=13420 XIV 41  
 POPTR\_0002=02140 XI-a 9  
 POPTR\_0001=03400 XII-a 54  
 POPTR\_0013=13660 XII-b 64  
 POPTR\_0002=02890 IV 86  
 POPTR\_0016=13400 IV 85  
 POPTR\_0001=08260 X 74  
 POPTR\_0010=13140 III 138  
 POPTR\_0002=12270 XIV 42  
 POPTR\_0008=07210 II 109  
 POPTR\_0003=11740 X 74  
 POPTR\_0006=19880 VI 37  
 POPTR\_0018=04030 III 141  
 POPTR\_0019=03830 XI-a 7  
 POPTR\_0006=25380 XI-a 6  
 POPTR\_0001=14140 XI-b 19  
 POPTR\_0017=03350 XII-b 65  
 POPTR\_0010=19270 II 109  
 POPTR\_0005=21990 XI-b 15  
 POPTR\_0013=15550 VIII 119  
 POPTR\_0006=29360 III 141  
 POPTR\_0003=10780 VII-a 24  
 POPTR\_0012=04160 XII-a 61  
 POPTR\_0005=08880 X 76  
 POPTR\_0009=08540 XI-a 5  
 POPTR\_0013=04630 XI-a 7  
 POPTR\_0013=11860 XI-c 20  
 POPTR\_0003=17350 XI-b 19  
 POPTR\_0001=16170 V 129  
 POPTR\_0014=00380 III 140  
 POPTR\_0007=15170 V 130  
 POPTR\_0003=06660 III 139  
 POPTR\_0004=06500 III 136  
 POPTR\_0017=03530 III 136  
 POPTR\_0001=16650 III 139  
 POPTR\_0012=14910 VII-b 28  
 POPTR\_0007=15220 III 140  
 POPTR\_0014=00340 V 130  
 POPTR\_0006=07820 III 142  
 POPTR\_0018=14390 III 142
