# Supplementary material for: Genome-wide identification, characterization and expression analysis of populus leucine-rich repeat receptor-like protein kinase genes
Source: PubMed Central journal article supplement (PMC3682895; doi:10.1186/1471-2164-14-318), 2013-05-10
Supplement: 1471-2164-14-318-S18.pdf [file 1471-2164-14-318-S18.pdf]

|           |        |           |                                                     |
|-----------|--------|-----------|-----------------------------------------------------|
| LRR-XI    | BAM1   | AT5G65700 | Barely any meristem1                                |
| LRR-XI    | BAM2   | AT3G49670 | Barely any meristem2                                |
| LRR-XI    | BAM3   | AT4G20270 | Barely any meristem3                                |
| LRR-Xa    | BIR1   | AT5G48380 | BAK1-interacting receptor-like kinase like1         |
| LRR-Xb    | BRI1   | AT4G39400 | Brassinosteroid insensitive1                        |
| LRR-Xb    | BRL1   | AT1G55610 | BAK1-interacting receptor-like kinase like1         |
| LRR-Xb    | BRL2   | AT2G01950 | BAK1-interacting receptor-like kinase like2         |
| LRR-Xb    | BRL3   | AT3G13380 | BAK1-interacting receptor-like kinase like3         |
| LRR-XV    | CLI1   | AT3G02130 | CLV3 peptide insensitive 1                          |
| LRR-XI    | CLV1   | AT1G75820 | CLAVATA 1                                           |
| LRR-I     | CRLK1  | AT5G54590 | Calcium/calmodulin-regulated receptor-like kinase 1 |
| LRR-I     | CRLK2  | AT5G15730 | Calcium/calmodulin-regulated receptor-like kinase 2 |
| LRR-XI    | EDA23  | AT5G44700 | Embryo sac development arrest23                     |
| LRR-XII   | EFR    | AT5G20480 | EF-TU receptor                                      |
| LRR-Xb    | EMS1   | AT5G07280 | Excess microsporocytes1                             |
| LRR-XIIIb | ERECTA | AT2G26330 | ERECTA                                              |
| LRR-XIIIb | ERL1   | AT5G62230 | ERECTA-LIKE 1                                       |
| LRR-XIIIb | ERL2   | AT5G07180 | ERECTA-LIKE 2                                       |
| LRR-XIIIa | FEI1   | AT1G31420 | named for the Chinese word for fat                  |
| LRR-XIIIa | FEI2   | AT2G35620 | named for the Chinese word for fat                  |
| LRR-XII   | FLS2   | AT5G46330 | Flagellin-sensitive-2                               |
| LRR-I     | FRK1   | AT2G19190 | Flg22-induced receptor-like kinase 1                |
| LRR-XI    | GSO1   | AT4G20140 | GASSH01                                             |
| LRR-XI    | HAE    | AT4G28490 | HAESA                                               |
| LRR-XI    | HAIKU2 | AT3G19700 |                                                     |
| LRR-III   | IMK2   | AT3G51740 | Inflorescence meristem receptor-like kinase2        |
| LRR-III   | IMK3   | AT3G56100 | Inflorescence meristem receptor-like kinase3        |
| LRR-I     | IOS1   | AT1G51800 | Impaired oomycete susceptibility                    |
| LRR-III   | LRR1   | AT5G16590 | Leucine-rich repeat 1                               |
| LRR-I     | MEE39  | AT3G46330 | Maternal effect embryo arrest 39                    |
| LRR-VII   | MEE62  | AT5G45800 | Maternal effect embryo arrest 62                    |
| LRR-XIV   | MOL1   | AT5G51350 | More lateral growth1                                |
| LRR-VI-2  | MRH1   | AT4G18640 | Morphogenesis of root hair 1                        |
| LRR-II    | NIK1   | AT5G16000 | NSP-interacting kinase 1                            |
| LRR-II    | NIK2   | AT3G25560 | NSP-interacting kinase 2                            |
| LRR-II    | NIK3   | AT1G60800 | NSP-interacting kinase 3                            |
| LRR-XI    | PEPR1  | AT1G73080 | PEP1 receptor 1                                     |
| LRR-XI    | PEPR2  | AT1G17750 | PEP1 receptor 2                                     |
| LRR-III   | PRK2A  | AT2G07040 | Pollen receptor like kinase 2                       |
| LRR-Xb    | PSKR1  | AT2G02220 | Phytosulfokin receptor 1                            |
| LRR-Xb    | PSKR2  | AT5G53890 | Phytosulfokin receptor 2                            |
| LRR-XI    | PXY    | AT5G61480 | Phloem intercalated with xylem                      |
| LRR-III   | RKL1   | AT1G48480 | Rreceptor-like kinase 1                             |
| LRR-XI    | RLK7   | AT1G09970 | LRR XI-23 Rreceptor-like kinase 7                   |
| LRR-III   | RLK902 | AT3G17840 | Rreceptor-like kinase 902                           |
| LRR-XV    | RPK1   | AT1G69270 | Rreceptor-like protein kinase 1                     |
| LRR-III   | RUL1   | AT5G05160 | Reduced in lateral growth1                          |
| LRR-II    | SARK   | AT4G30520 | Senescence-associated Rreceptor-like kinase         |
| LRR-V     | SCM    | AT1G11130 | Scrambled                                           |
| LRR-II    | SERK1  | AT1G71830 | Somatic embryogenesis receptor-like kinase1         |
| LRR-II    | SERK2  | AT1G34210 | Somatic embryogenesis receptor-like kinase2         |
| LRR-II    | SERK3  | AT4G33430 | Somatic embryogenesis receptor-like kinase3         |
| LRR-II    | SERK4  | AT2G13790 | Somatic embryogenesis receptor-like kinase4         |

|         |       |           |                                             |
|---------|-------|-----------|---------------------------------------------|
| LRR-II  | SERK5 | AT2G13800 | Somatic embryogenesis receptor-like kinase5 |
| LRR-V   | SRF1  | AT2G20850 | Strubbelig-receptor family 1                |
| LRR-V   | SRF2  | AT5G06820 | Strubbelig-receptor family 2                |
| LRR-V   | SRF3  | AT4G03390 | Strubbelig-receptor family 3                |
| LRR-V   | SRF4  | AT3G13065 | Strubbelig-receptor family 4                |
| LRR-V   | SRF5  | AT1G78980 | Strubbelig-receptor family 5                |
| LRR-V   | SRF6  | AT1G53730 | Strubbelig-receptor family 6                |
| LRR-V   | SRF7  | AT3G14350 | Strubbelig-receptor family 7                |
| LRR-V   | SRF8  | AT4G22130 | Strubbelig-receptor family 8                |
| LRR-III | TMKL1 | AT3G24660 | Transmembrane kinase-like 1                 |
| LRR-XI  | XIP1  | AT5G49660 | Xylem intermixed with phloem 1              |
